# Supplementary material
Source: PubMed Central journal article supplement (PMC6116827)
Supplement: TX-007-C8TX00108A-s001.pdf [file TX-007-C8TX00108A-s001.pdf]

**Haemolytic and Cellular Toxicology of Sulfanilamide-Based Nonionic Surfactant: A  
Niosomal Carrier for Hydrophobic Drugs**

Imdad Ali<sup>1</sup>, Muhammad Raza Shah<sup>1\*</sup>, Sammer Yousuf<sup>1</sup>, Shakil Ahmed<sup>1</sup>, Kiramat Shah<sup>1</sup>,  
Ibrahim Javed<sup>2\*</sup>

<sup>1</sup> H.E.J. Research Institute of Chemistry, International Center for Chemical and Biological  
Sciences, Karachi University, Karachi 74200, Pakistan

<sup>2</sup> ARC Centre of Excellence in Convergent Bio-Nano Science and Technology, Monash  
Institute of Pharmaceutical Sciences, Monash University, 381 Royal Parade, Parkville,  
Victoria 3052, Australia

**Corresponding author:**

DMuhammad Raza Shah, [raza.shah@iccs.edu](mailto:raza.shah@iccs.edu)

Ibrahim Javed, [ibrahim.javed@monash.edu](mailto:ibrahim.javed@monash.edu)

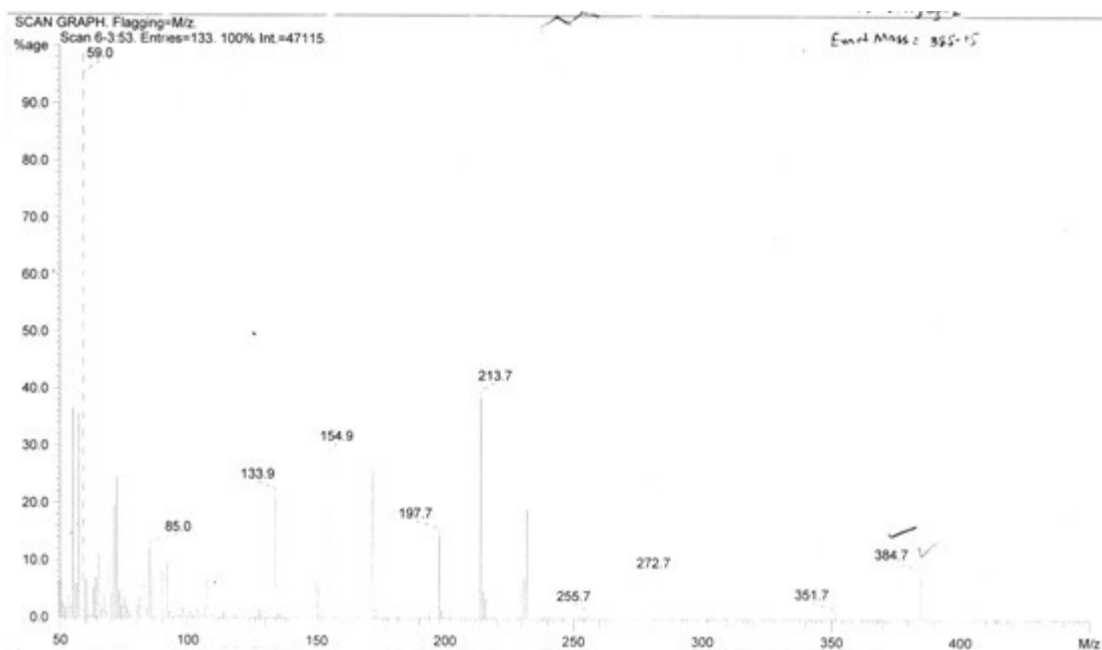

**Figure S1:** Mass spectra of the synthesized surfactant S-SDC

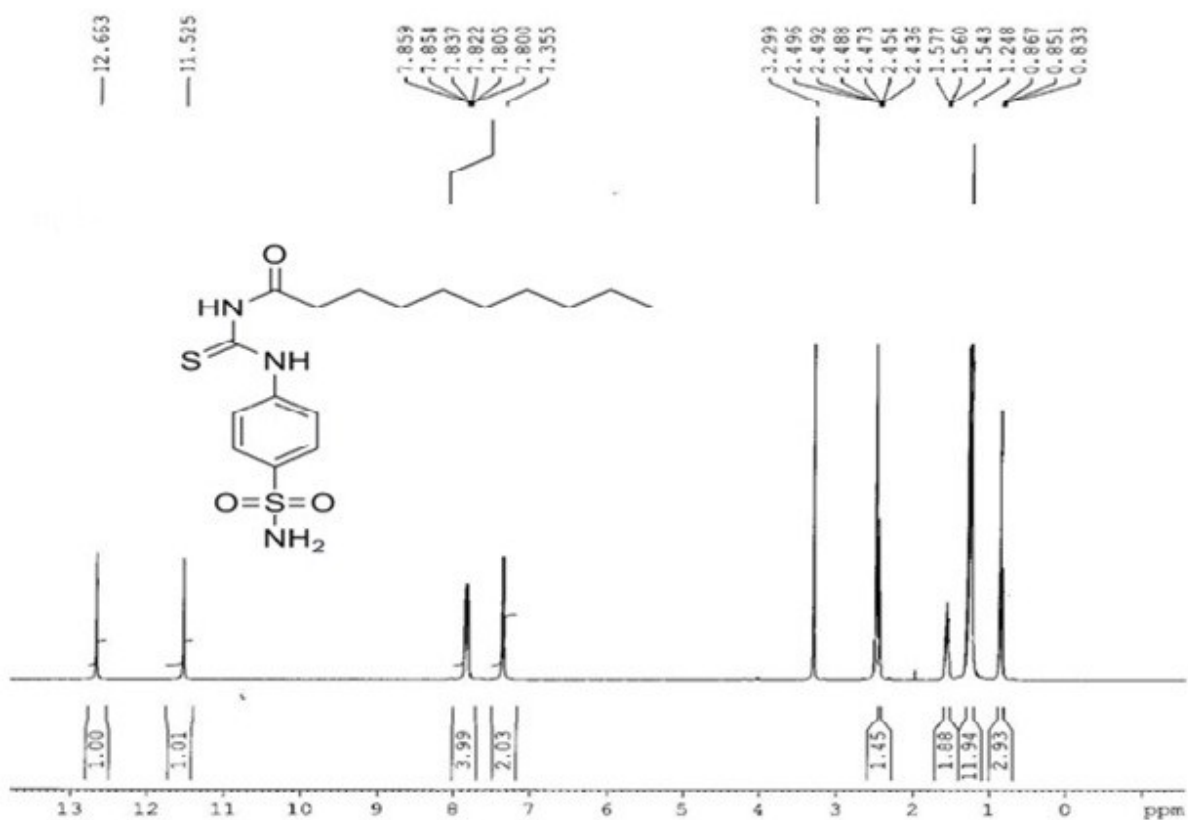

**Figure S2:**  $^1\text{H}$ NMR spectra of the synthesized surfactant S-SDC

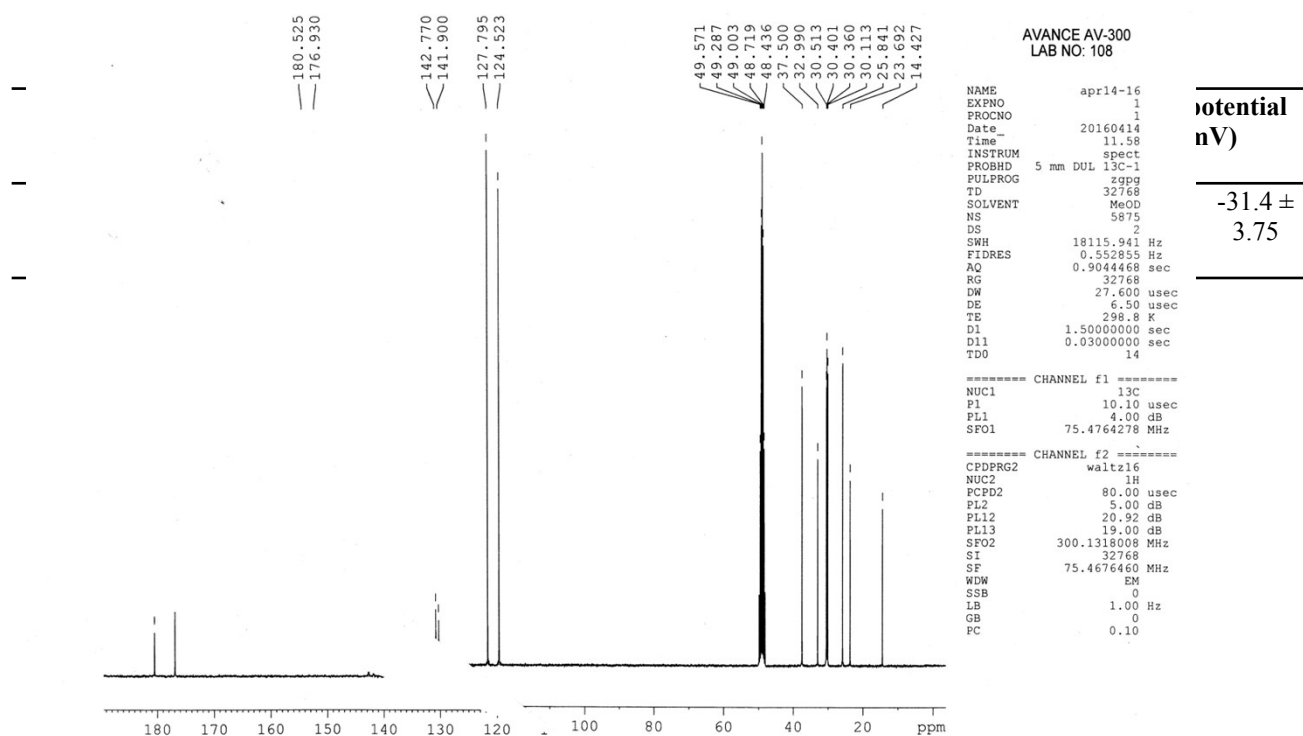

**Figure S3:** <sup>13</sup>CNMR spectra of the synthesized surfactant S-SDC

**Table 1.** Compositional ratio, size and drug loading efficiency of S-SDC drug loaded niosomes.

| Sample                                     | Composition<br>S-SDC/Cholesterol/Drug<br>(ratio) | Drug<br>entrapment<br>efficiency (%) | Average<br>vesicle size<br>(nm) | Hydrodynamic<br>diameter (nm) | Zeta potential<br>(mV) |
|--------------------------------------------|--------------------------------------------------|--------------------------------------|---------------------------------|-------------------------------|------------------------|
| Clarithromycin<br>loaded S-SDC<br>niosomes | 15 : 5 : 7                                       | 65.83 ± 2.59                         | 234 ± 3.61                      | 270 ± 8.61                    | -31.4 ± 3.75           |
